# Supplementary material for: Boronic acid and boronic ester containing polyoxometalates
Source: Royal Society of Chemistry journal article supplement (doi:10.1039/c6dt04197c), 2016-01-01
Supplement: c6dt04197c1.pdf [file c6dt04197c1.pdf]

## Supporting Information

### **Boronic acid and boronic ester containing polyoxometalates**

*Hedi Karoui and Chris Ritchie\**

## INSTRUMENTATION and PROCEDURES

The polyoxometalate precursor  $(N(C_4H_9)_4)_3[MnMo_6O_{18}\{(OCH_2)_3CNH_2\}_2]$  was synthesized via literature procedure.<sup>[1]</sup> All other chemical reagents were reagent grade and used as purchased without any further purification.

### Bond Valence Sum Calculations:

Bond valence sum calculations were performed using the bond valence calculator, version 2.00 February 1993, written by C. Hormillosa with assistance from S. Healy, distributed by I. D. Brown.<sup>[2]</sup>

**FT-IR spectroscopy (KBr disc):** FT-IR spectroscopy was performed on a Bruker Tensor 27 FT-IR spectrometer. Samples were prepared as KBr pellets. Signals are listed as wavenumbers ( $cm^{-1}$ ) with the following abbreviations: vs = very strong, s = strong, m = medium and w = weak.

**Elemental Analysis:** Elemental Analysis was conducted by the Campbell Microanalytical Laboratory and the Centre for Trace Element Analysis at the University of Otago, New Zealand. Samples were diluted and analyzed on an Agilent 7500<sup>ce</sup> ICP-MS which was tuned to manufacturer recommendations to minimize interference and instrumental drift. Calibration standards were prepared by a serial dilution on SPEX CertiPrep (NIST traceable).

**NMR spectroscopy:**  $^1H$  NMR spectroscopy was performed on a Varian 400 MHz NMR Spectrometer using a pulse width of  $\pi/2$  (11.25  $\mu s$ ), carbon decoupled.

**X ray crystallography:** Single crystal X-ray data was collected using an Agilent Technologies SuperNova Dual Wavelength single crystal X-ray diffractometer at 130 K using Cu K-alpha (0.15418 nm) fitted with a mirror monochromator. The data was reduced using CrysAlisPro software (Version 1.171.38.41) using a numerical absorption correction based on Gaussian integration over a multifaceted crystal model. Data was solved using direct methods by SHELXT and refined using a full-matrix least square procedure based upon  $F^2$ .<sup>[3]</sup> Data was refined using the OLEX2 software package Version 1.2.7.<sup>[4]</sup>

**1a** - Significant crystallographic disorder was observed for compound **1a**. Several datasets were collected on recrystallized samples with this being the best obtainable structure. Molybdenum, manganese and oxygen atoms on the polyoxometalate are refined anisotropically with the grafted triol ligands atoms being refined isotropically. The triol ligand is modelled in two orientations with DFIX, DANG, EADP constraints and PART instructions required to obtain a stable refinement. A solvent mask was also required to account for the tetrabutylammonium (TBA) cations.

**1b** – Two crystallographically unique polyanions are observed in **1b**. One of these polyanions are ordered meanwhile the other is severely disordered with the polyanion adopting two orientations with relative populations of 73.2% and 26.8% as determined using free variables. Consequently, the polyanions oxygen atoms are disordered over two sets of sites with these relative occupancies, meanwhile the molybdenum and manganese atoms are unaffected by this disorder. The methylene carbon atoms of the grafted tripodal ligand also present the same disorder with the remainder of the ligand showing no disorder due to free rotation around the C-N bond and intermolecular interactions in the solid state. The metal-oxide framework of the polyanion is refined anisotropically with the remainder of the molecule refined isotropically. Once again DANG, DFIX and EADP constraints are applied where necessary along with the use of the PART instruction to model the disorder. Minimal disorder is observed for the TBA cations and DMF solvent molecules, and are refined isotropically.

**1c** – No disorder is observed for **1c** with all non-hydrogen atoms refined anisotropically.

### Synthesis of **1a**:

2-formyl phenyl boronic acid (15 mg, 0.1 mmol) was dissolved in 200  $\mu L$  of dimethylformamide (DMF) and added to a 400  $\mu L$  solution of  $(N(C_4H_9)_4)_3[MnMo_6O_{18}\{(OCH_2)_3CNH_2\}_2]$ <sup>1</sup> (100 mg, 0.0487 mmol) in DMF. The resulting solution was exposed to diethyl ether vapour and diffraction quality crystals appeared over a 6 hours period. Yield: 62 mg (60%).

$C_{70}H_{134}B_2Mn_1Mo_6N_5O_{26}$  (MW: 2114.03 g/mol) calcd. C 39.77%, H 6.39%, N 3.31%; found C 39.16 %, H 6.42%, N 3.68%. IR ( $cm^{-1}$ ): 3421(m), 2964(s), 2934(s), 2873(s), 1640(s), 1600(s), 1578(s), 1478(s), 1463(s), 1442(s), 1386(s), 1350(s), 1260(s), 1204(s), 1153(s), 1089(s), 1026(s), 949(vs), 940(s), 918(s), 904(s), 802(s), 757(s), 738(s), 663(vs), 565(s), 457(s), 414(s).  $^1H$  NMR ( $d_6$ -DMSO, 400 MHz):  $\delta$  (ppm) 0.93 (t,  $-CH_3$   $[Bu_4N]^+$ ), 1.32 (q,  $-CH_2$   $[Bu_4N]^+$ ), 2.50 (q, DMSO), 3.16 (t,  $CH_2$   $[Bu_4N]^+$ ), 3.35 (s,  $H_2O$ ), 7.20 (t, -AR), 7.48 (s, -AR), 7.63 (d, -AR), 8.33 (s, B-OH), 62.96 (s,  $-OCH_2$ ).

#### Synthesis of **1b**:

2-formyl phenyl boronic acid (15 mg, 0.1 mmol) was dissolved in 400  $\mu$ L of methanol and added to a 400  $\mu$ L solution of  $(\text{N}(\text{C}_4\text{H}_9)_4)_3[\text{MnMo}_6\text{O}_{18}\{(\text{OCH}_2)_3\text{CNH}_2\}_2]$  (100 mg, 0.0487 mmol) in methanol. On mixing instant precipitation of an orange microcrystalline product resulted. This precipitate was filtered and washed several times with methanol. The crude product was then air dried. Recrystallization from DMF results in diffraction quality crystals over a 2 days period. Yield: 36 mg (35%).

$\text{C}_{72}\text{H}_{138}\text{B}_2\text{Mn}_1\text{Mo}_6\text{N}_5\text{O}_{26}$  (MW: 2142.08 g/mol) calcd. C 40.37 %, H 6.49 %, N 3.27 %; found C 40.19 %, H 6.43 %, N 3.28 %. IR ( $\text{cm}^{-1}$ ): 3436(w), 2962(m), 2938(s), 2873(s), 1640(s), 1596(s), 1558(s), 1485(s), 1466(s), 1441(s), 1378(s), 1345(s), 1281(s), 1248(s), 1156(s), 1072(s), 1020(s), 947(vs), 922(s), 904(s), 802(s), 763(s), 734(s), 666(vs), 560(s), 530(s), 453(s), 405(s).  $^1\text{H}$  NMR ( $d_6$ -DMSO, 400 MHz):  $\delta$  (ppm) 0.93 (t,  $-\text{CH}_3$  [ $\text{Bu}_4\text{N}^+$ ]), 1.32 (q,  $-\text{CH}_2$  [ $\text{Bu}_4\text{N}^+$ ]), 2.50 (q, DMSO), 3.16 (t,  $\text{CH}_2$  [ $\text{Bu}_4\text{N}^+$ ]), 3.35 (s,  $\text{H}_2\text{O}$ ), 7.20 (t, AR-), 7.48 (t, AR-), 7.61 (d, AR-), 8.31 (s, B-OH), 62.87 (s,  $-\text{OCH}_2-$ ).

#### Synthesis of **1c**:

2-formyl phenyl boronic acid (15 mg, 0.1 mmol) was dissolved in 200  $\mu$ L of DMF, 1,3-Propanediol (50 $\mu$ L, 0.70  $10^{-3}$  mmol) was added. The resulting solution was added to a 400  $\mu$ L solution of  $(\text{N}(\text{C}_4\text{H}_9)_4)_3[\text{MnMo}_6\text{O}_{18}\{(\text{OCH}_2)_3\text{CNH}_2\}_2]$  (100 mg, 0.0487 mmol) in DMF. The resulting solution was exposed to diethyl ether vapour and diffraction quality crystals appeared over a 1 day period. Yield: 45 mg (42%).  $\text{C}_{76}\text{H}_{150}\text{B}_2\text{Mn}_1\text{Mo}_6\text{N}_5\text{O}_{26}$  (MW: 2202.22 g/mol) calcd. C 41.45%, H 6.87%, N 3.18%; found C 41.02%, H 6.54 %, N 3.29 %. IR ( $\text{cm}^{-1}$ ): 2971(w), 2933(s), 2874(s), 2022(s), 1940(s), 1863(s), 1824(s), 1679(s), 1640(s), 1596(s), 1558(s), 1494(s), 1461(s), 1422(s), 1378(s), 1325(s), 1138(s), 1088(s), 1025(s), 947(vs), 923(vs), 894(vs), 797(s), 768(s), 734(s), 666(vs), 589(s), 560(s), 560(s), 511(s), 465(s), 409(s).  $^1\text{H}$  NMR ( $d_6$ -DMSO, 400 MHz):  $\delta$  0.93 (t,  $-\text{CH}_3$  [ $\text{Bu}_4\text{N}^+$ ]), 1.32 (q,  $-\text{CH}_2$  [ $\text{Bu}_4\text{N}^+$ ]), 2.50 (q, DMSO), 3.16 (t,  $\text{CH}_2$  [ $\text{Bu}_4\text{N}^+$ ]), 3.35 (s,  $\text{H}_2\text{O}$ ), 3.99 (s,  $-(\text{CH}_2)_3$ ), 7.20 (t, -AR), 7.49-7.64 (m, -AR), 63.10 (s,  $-\text{OCH}_2$ ).

S1. Infrared spectrum of a freshly crystallized sample of **1a**

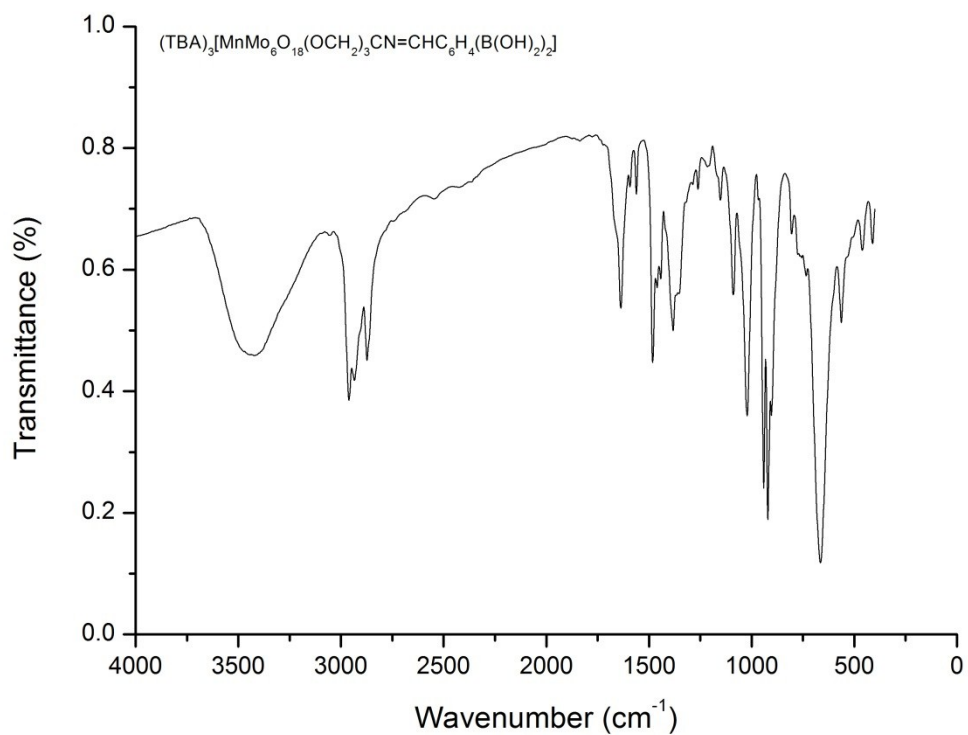

S2. Infrared spectrum of a freshly crystallized sample of **1b**

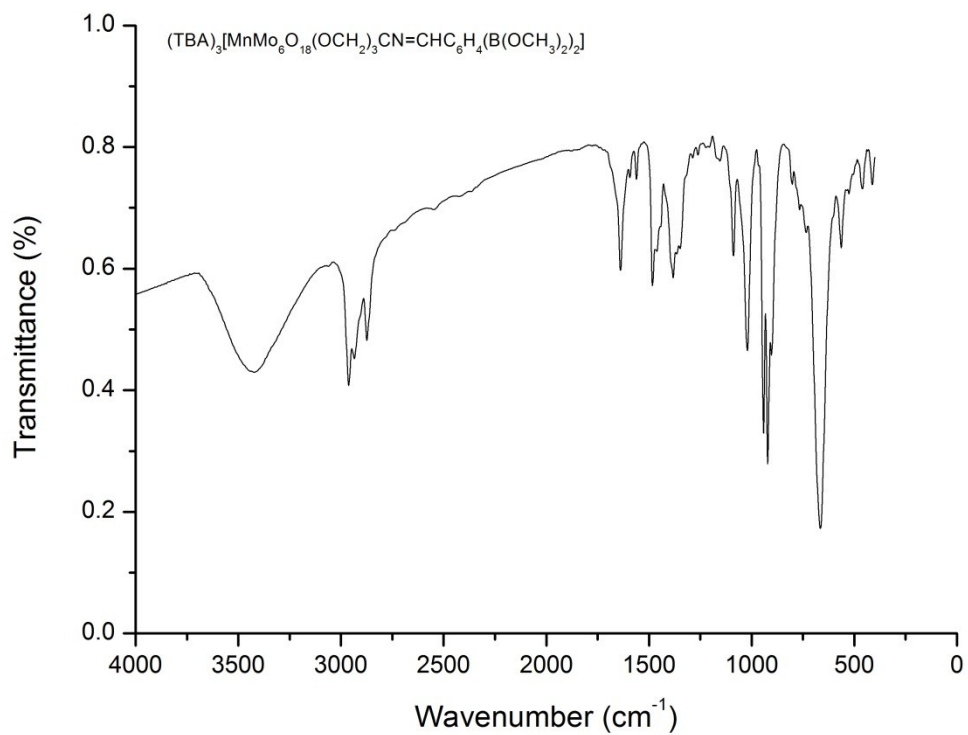

S3. Infrared spectrum of a freshly crystallized sample of **1c**

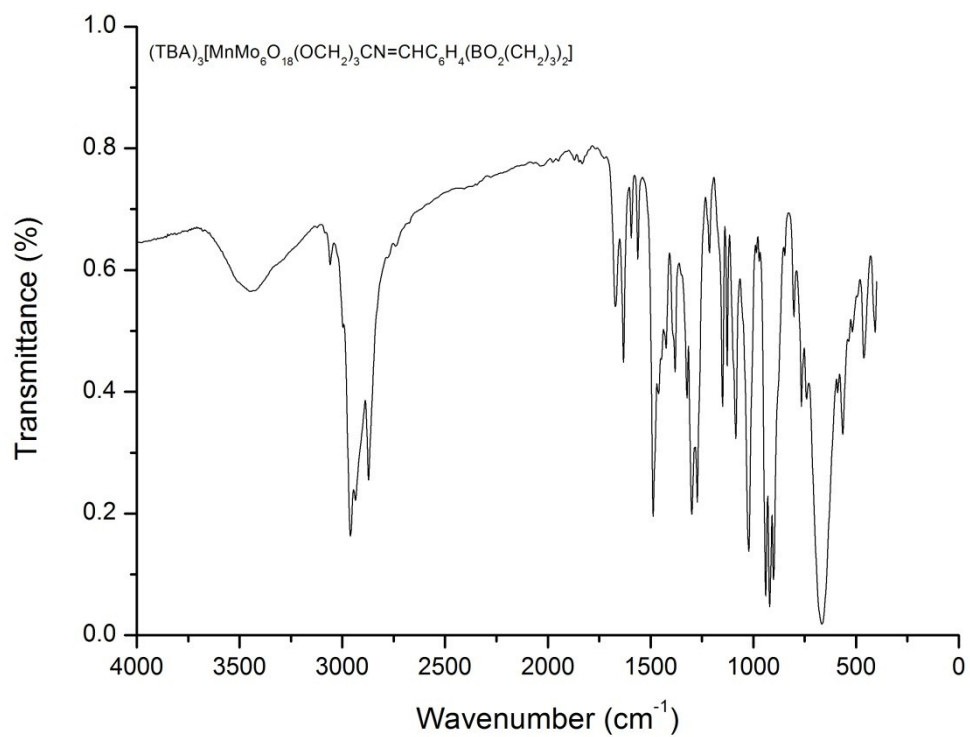

# Nuclear Magnetic Resonance Spectroscopy

## I. Compound analysis

### S4. NMR Spectrum (400 MHz) 1a

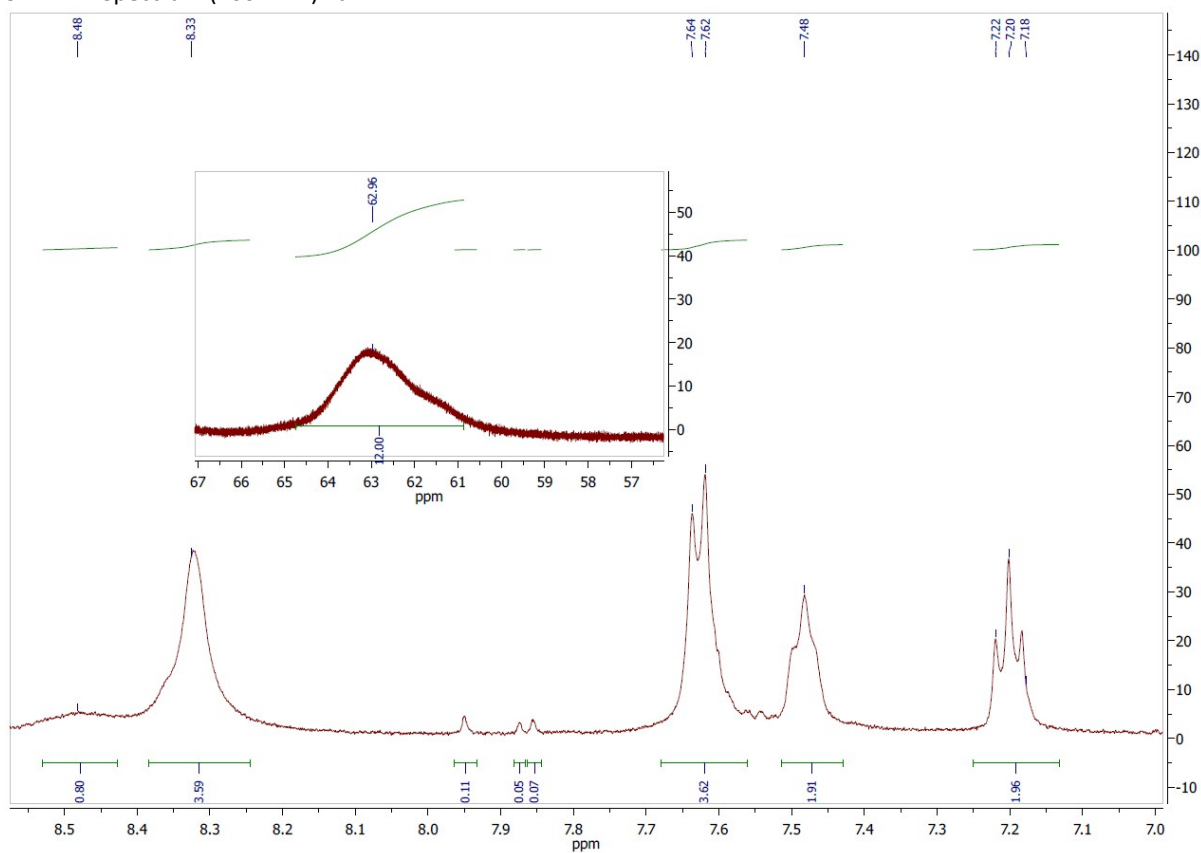

<sup>1</sup>H NMR (d<sub>6</sub>-DMSO, 400 MHz):

δ (ppm) 0.93 (t, -CH<sub>3</sub> [Bu<sub>4</sub>N]<sup>+</sup>), 1.32 (q, -CH<sub>2</sub> [Bu<sub>4</sub>N]<sup>+</sup>), 2.50 (q, DMSO), 3.16 (t, CH<sub>2</sub> [Bu<sub>4</sub>N]<sup>+</sup>), 3.35 (s, H<sub>2</sub>O), 7.20 (t, -AR), 7.48 (s, -AR), 7.63 (d, -AR), 8.33 (s, B-OH), 62.96 (s, -OCH<sub>2</sub>).

The small peaks between 7.8-8 ppm correspond to a small amount of 2-Formyl phenyl boronic acid that couldn't be cleaned.

## S5. NMR Spectrum (400 MHz) **1b**

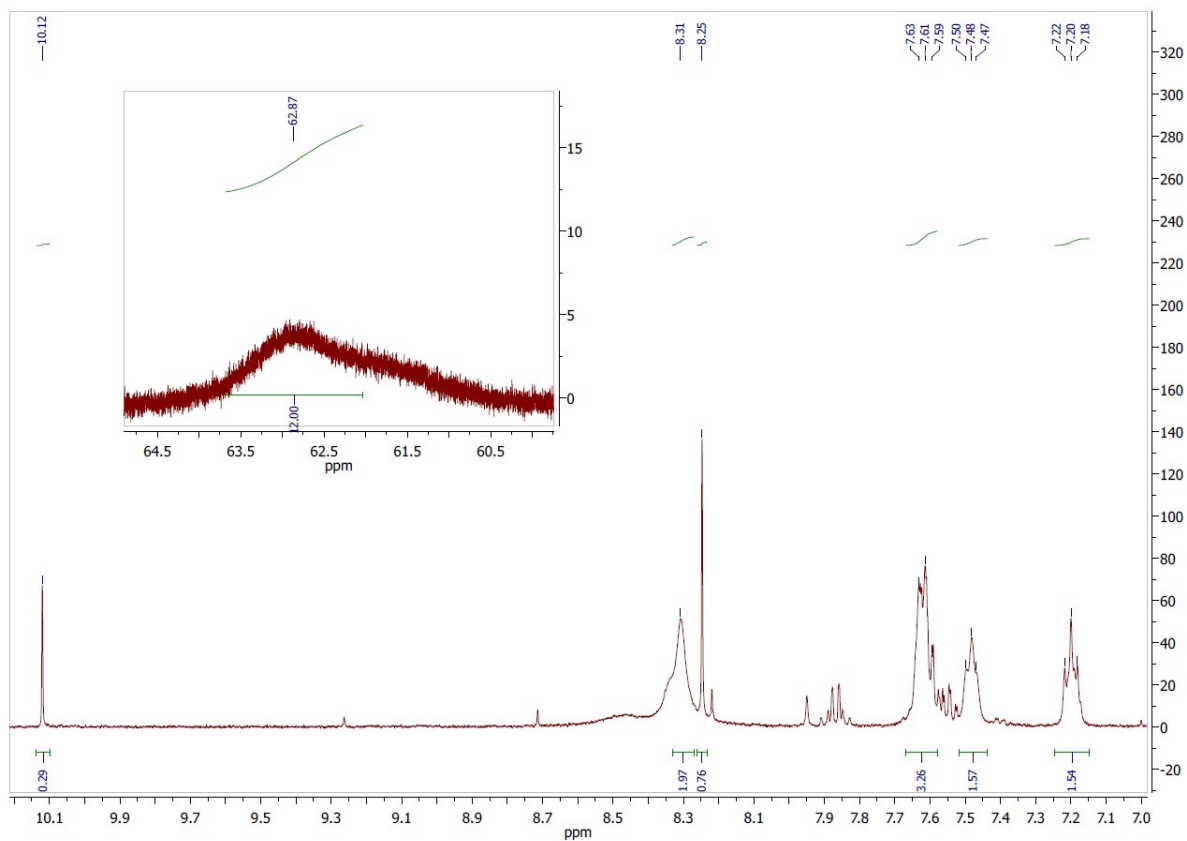

$^1\text{H}$  NMR ( $\text{d}_6$ -DMSO, 400 MHz):

$\delta$  (ppm) 0.93 (t,  $-\text{CH}_3$  [ $\text{Bu}_4\text{N}^+$ ]), 1.32 (q,  $-\text{CH}_2$  [ $\text{Bu}_4\text{N}^+$ ]), 2.50 (q, DMSO), 3.16 (t,  $\text{CH}_2$  [ $\text{Bu}_4\text{N}^+$ ]), 3.35 (s,  $\text{H}_2\text{O}$ ), 7.20 (t, AR-), 7.48 (t, AR-), 7.61 (d, AR-), 8.31 (s, B-OH), 62.87 (s,  $-\text{OCH}_2-$ ).

2-Formyl phenyl boronic acid peaks were observed between 7.8-8 ppm due to  $\text{H}_2\text{O}$  generation upon Schiff base coupling leading to the partial hydrolysis of the imine linkage. The boronic acid peak is observed at 8.25 ppm and the aldehyde peak was observed at 10.12 ppm.

## S6. NMR Spectrum (400 MHz) 1c

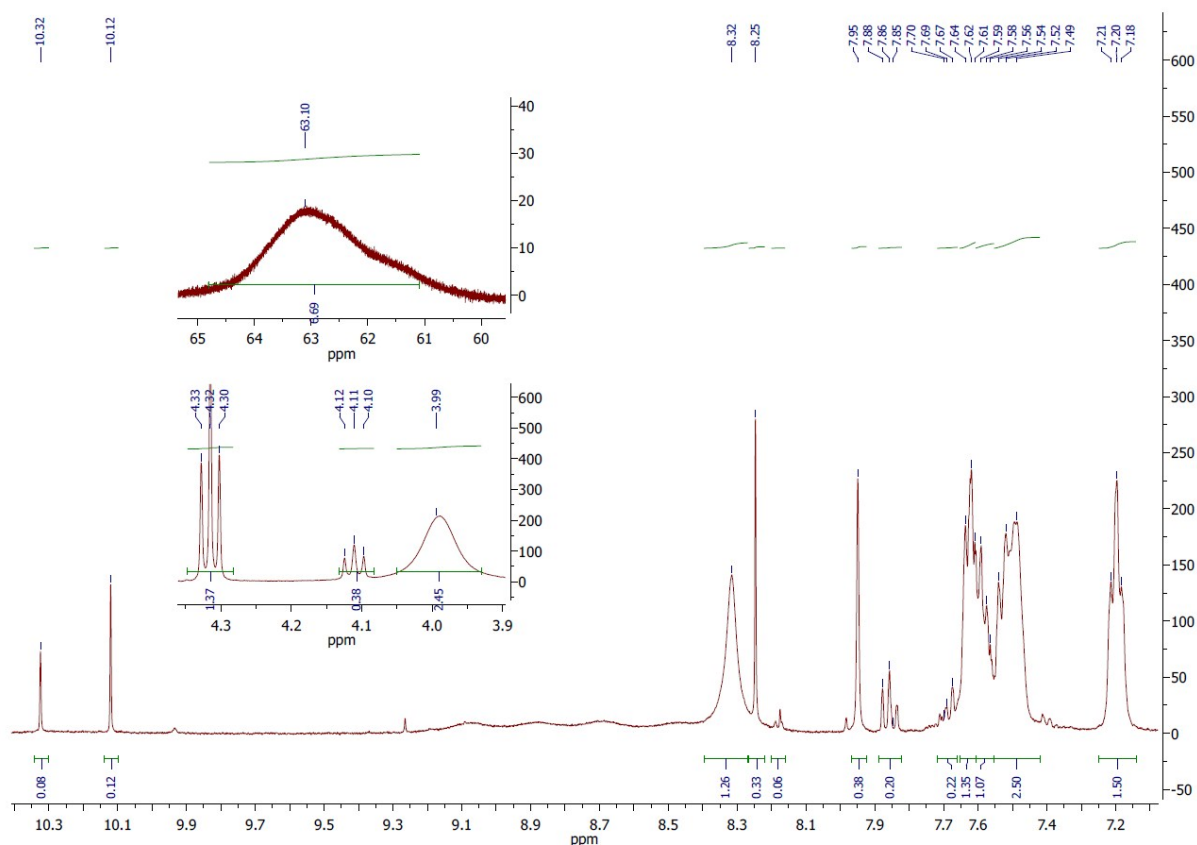

<sup>1</sup>H NMR (d<sub>6</sub>-DMSO, 400 MHz):

- Compound (**1c**)  
 $\delta$  (ppm) 0.93 (t, -CH<sub>3</sub> [Bu<sub>4</sub>N]<sup>+</sup>), 1.32 (q, -CH<sub>2</sub> [Bu<sub>4</sub>N]<sup>+</sup>), 2.50 (q, DMSO), 3.16 (t, CH<sub>2</sub> [Bu<sub>4</sub>N]<sup>+</sup>), 3.35 (s, H<sub>2</sub>O), 3.99 (s, -(CH<sub>2</sub>)<sub>3</sub>), 7.20 (t, -AR), 7.49-7.64 (m, -AR), 63.10 (s, -OCH<sub>2</sub>).
- Compound (**1a**)  
 Due to signals overlapping in the aromatic region, it is hard to distinguish these peaks. However, the boronic acid singlet was observed at 8.32 ppm.
- 2-Formyl phenyl boronic acid peaks were observed between 7.8-8 ppm due to H<sub>2</sub>O generation upon Schiff base coupling leading to the partial hydrolysis of the imine linkage. The boronic acid peak is observed at 8.25 ppm and the aldehyde peak was observed at 10.12 ppm.
- 4-(1,3,2-dioxaborinan-2-yl)benzaldehyde:  $\delta$  4.11 (t, -(CH<sub>2</sub>)<sub>3</sub>), 7.86 (t, Ar), 10.32 (s, -CH=O).
- propane-1,3-diol:  
 $\delta$  4.32 (t, CH<sub>3</sub>-CH<sub>2</sub>-CH<sub>3</sub>)



S7. NMR Spectrum (400 MHz) 2-formyl phenyl boronic acid

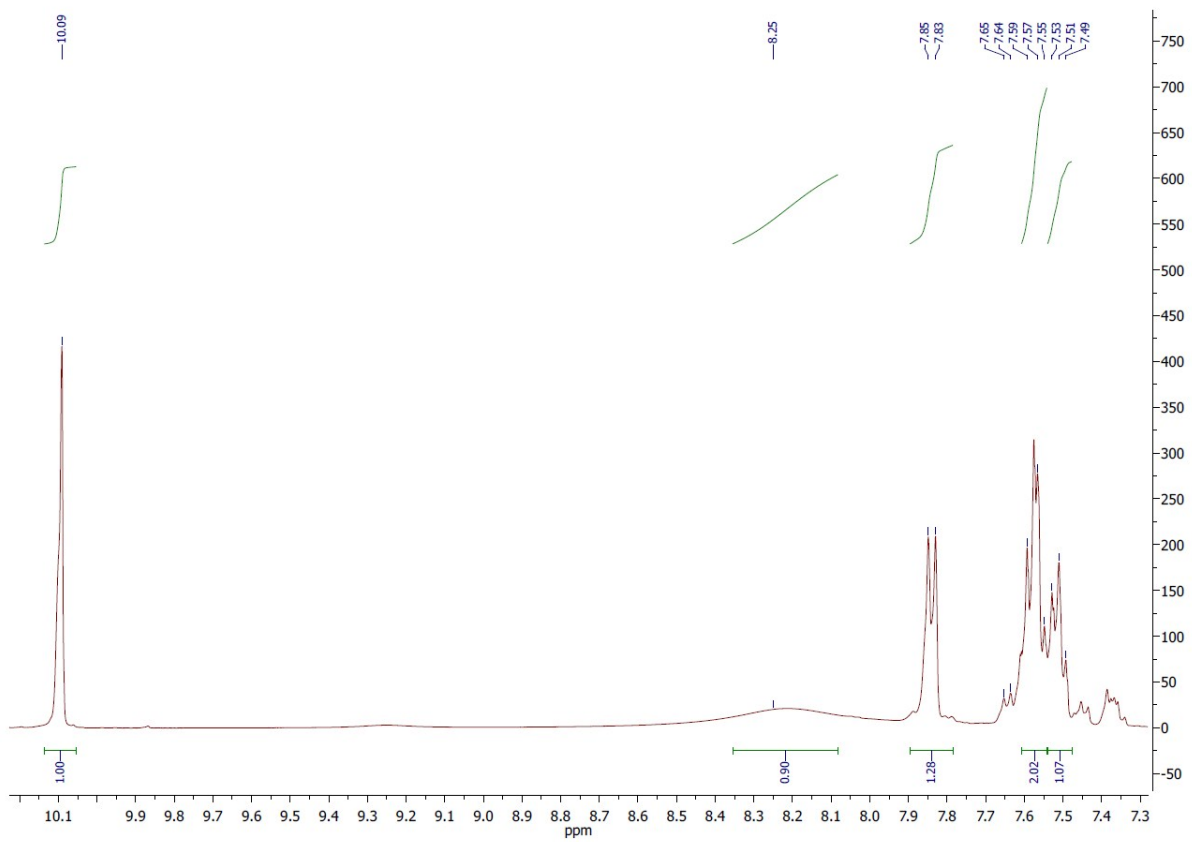

## II. Titration experiments:

Signals overlapping in the aromatic region make it impossible to assign these peaks. Therefore, we are only showing the methylene glycol peaks between 3.9 and 4.4 ppm and the highly deshielded ( $-\text{OCH}_2$ ) peaks between 61 and 65 ppm.

### S8. NMR Spectrum (400 MHz) addition of 0.5 equivalents of propane-1,3-diol to 1a in $\text{d}_6$ -DMSO

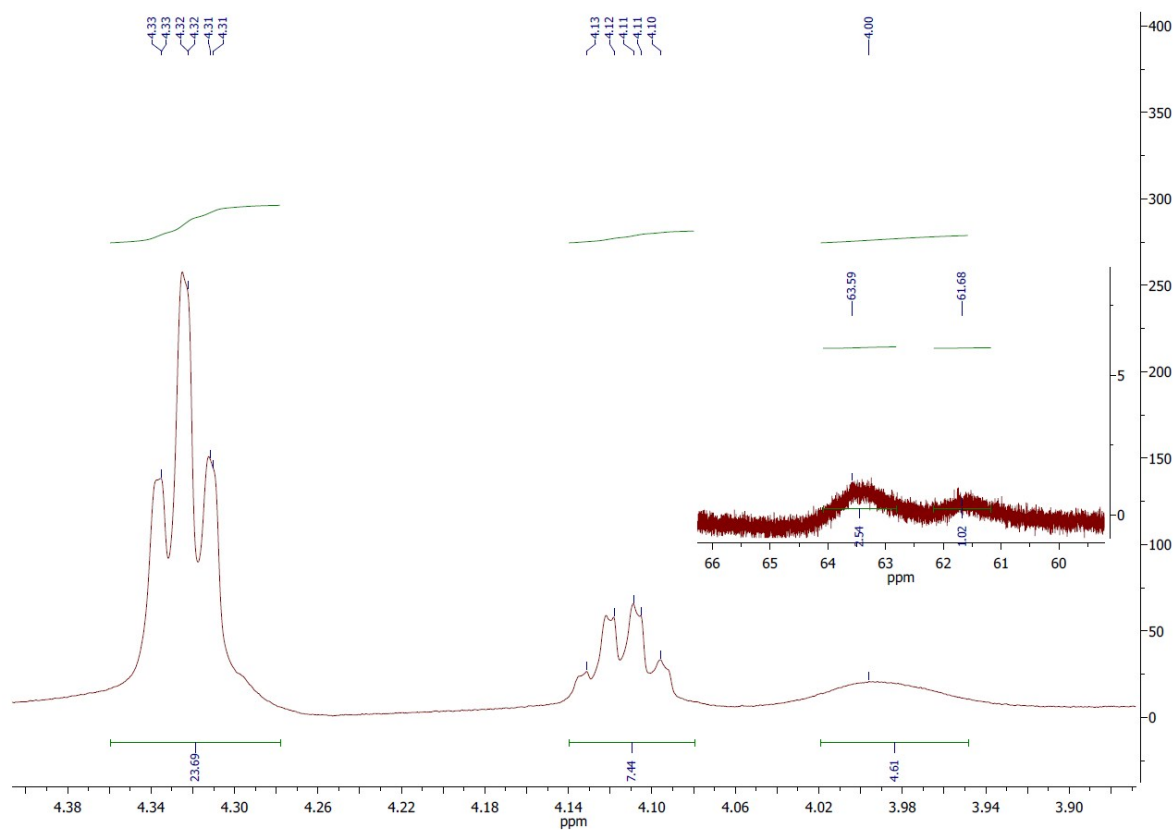

**Compound (1c):** 4.00 ppm

4-(1,3,2-dioxaborinan-2-yl)benzaldehyde: 4.12 ppm

propane-1,3-diol: 4.32 ppm

$-\text{OCH}_2$  ( $(\text{N}(\text{C}_4\text{H}_9)_4)_3[\text{MnMo}_6\text{O}_{18}\{(\text{OCH}_2)_3\text{CNH}_2\}_2]$ ): 61.68 ppm

$-\text{OCH}_2$  (**1c**): 63.59 ppm

S9. NMR Spectrum (400 MHz) addition of 2 equivalents of propane-1,3-diol to 1a in d<sub>6</sub>-DMSO

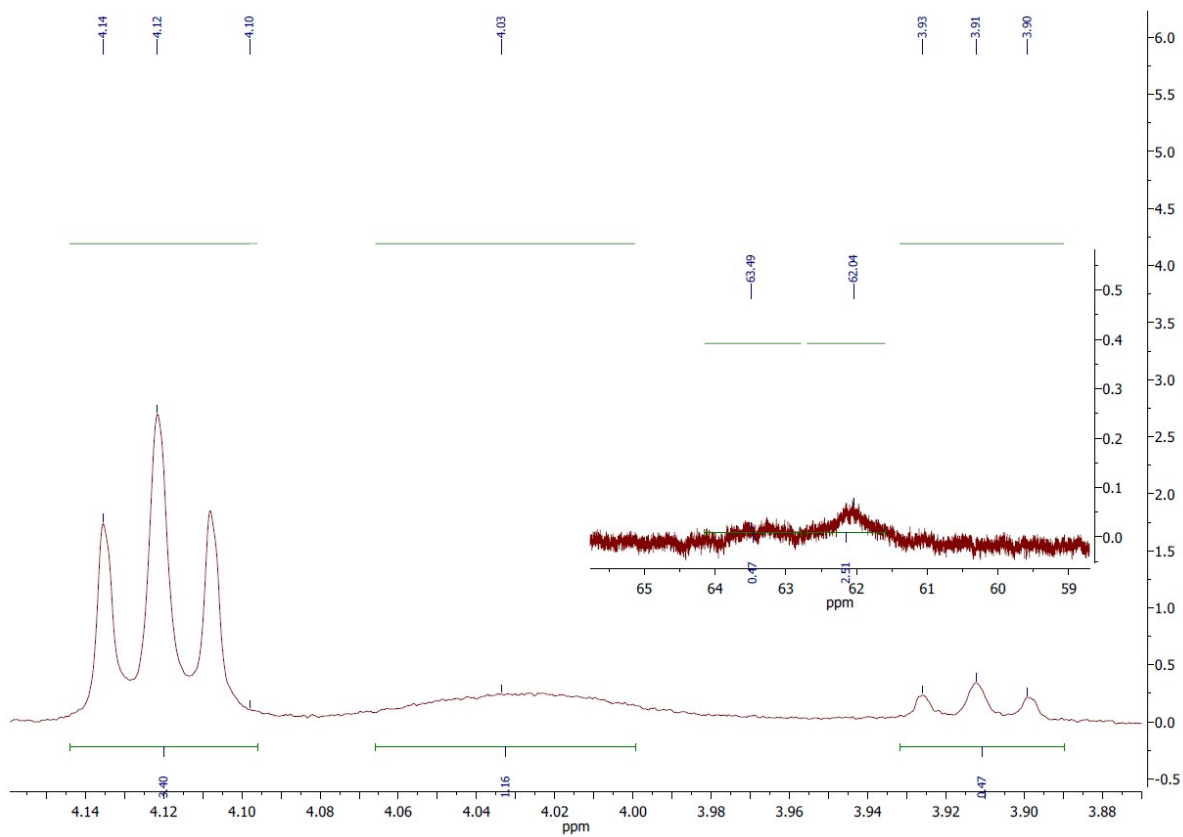

**Compound (1c):** 4.03 ppm

4-(1,3,2-dioxaborinan-2-yl)benzaldehyde: 3.91 ppm

propane-1,3-diol: 4.12 ppm

-OCH<sub>2</sub> ((N(C<sub>4</sub>H<sub>9</sub>)<sub>4</sub>)<sub>3</sub>[MnMo<sub>6</sub>O<sub>18</sub>{(OCH<sub>2</sub>)<sub>3</sub>CNH<sub>2</sub>}]<sub>2</sub>): 62.04 ppm

-OCH<sub>2</sub> (1c) 63.49 ppm

**S10. NMR Spectrum (400 MHz) addition of 4 equivalents of propane-1,3-diol to 1a in d<sub>6</sub>-DMSO**

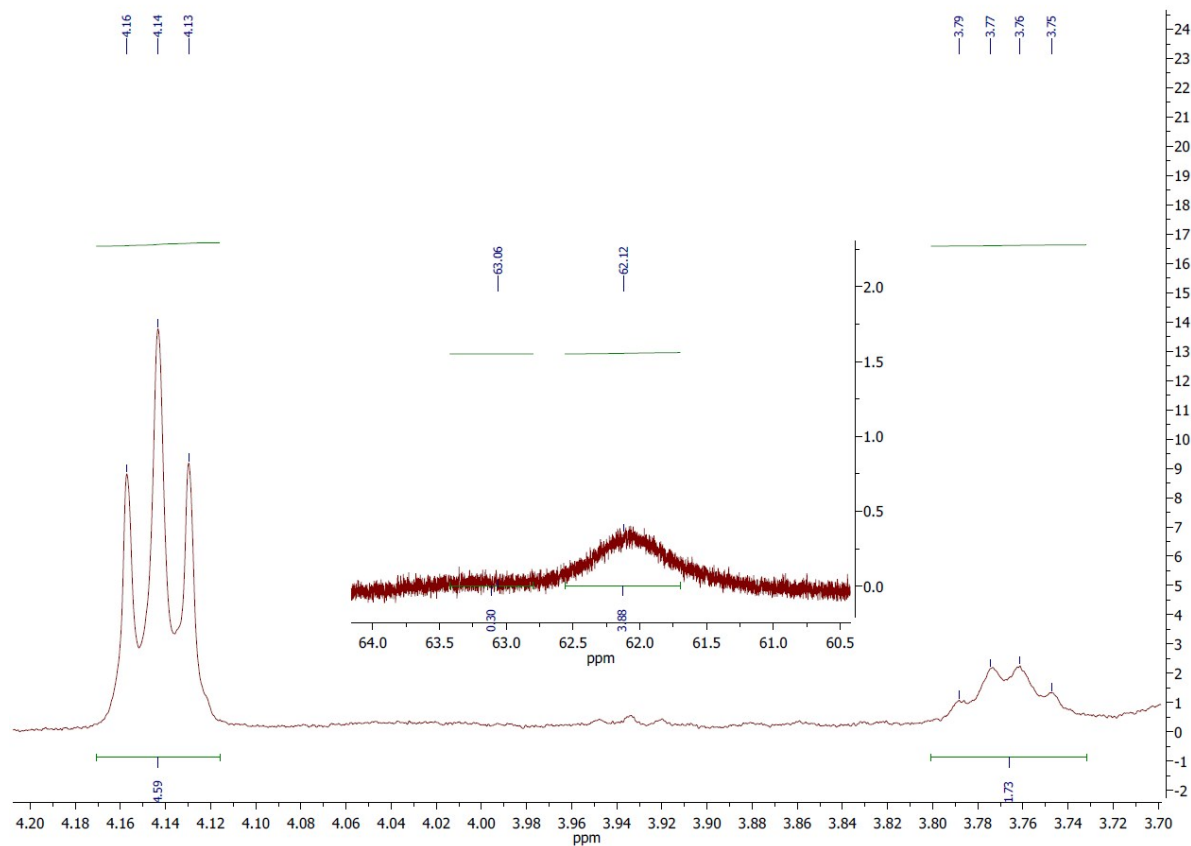

4-(1,3,2-dioxaborinan-2-yl)benzaldehyde: 3.77 ppm  
propane-1,3-diol: 4.14 ppm

-OCH<sub>2</sub> ((N(C<sub>4</sub>H<sub>9</sub>)<sub>4</sub>)<sub>3</sub>[MnMo<sub>6</sub>O<sub>18</sub>{(OCH<sub>2</sub>)<sub>3</sub>CNH<sub>2</sub>}]<sub>2</sub>): 62.12 ppm  
-OCH<sub>2</sub> (**1c**): 63.06 ppm

**Table 1.** BVS calculations for **1a**

The individual bond valences in turn are calculated from the observed bond lengths.

$$V_i = \sum V_i$$

$R_i$  is the observed bond length,  $R_0$  is a tabulated parameter expressing the (ideal) bond length when the element  $i$  has exactly valence 1, and  $B$  is an empirical constant, typically 0.37 Å.

$$V_i = \exp[(R_0 - R_i)/B]$$

|     | Mo                 | Ro    | B        |     | Mo                 | Ro    | B        |
|-----|--------------------|-------|----------|-----|--------------------|-------|----------|
|     |                    | 1.907 | 0.37     |     |                    | 1.907 | 0.37     |
| O7  | Mo <sup>VI</sup> 2 | 1.667 | 1.912954 | O3  | Mo <sup>VI</sup> 1 | 1.696 | 1.768745 |
| O6  |                    | 1.664 | 1.928527 | O1  |                    | 1.887 | 1.055542 |
| O4  |                    | 1.904 | 1.008141 | O4  |                    | 1.909 | 0.994609 |
| O5  |                    | 2.348 | 0.303646 | O11 |                    | 2.327 | 0.321379 |
| O12 |                    | 2.329 | 0.319646 | O5  |                    | 2.357 | 0.296349 |
| O8  |                    | 1.923 | 0.957678 | O2  |                    | 1.684 | 1.82705  |
|     |                    |       | 6.430593 |     |                    |       | 6.263674 |

|     | Mo                 | Ro    | B        |     | Mn                | Ro    | B        |
|-----|--------------------|-------|----------|-----|-------------------|-------|----------|
|     |                    | 1.907 | 0.37     |     |                   | 1.732 | 0.37     |
| O10 | Mo <sup>VI</sup> 3 | 1.709 | 1.707679 | O11 | Mn <sup>III</sup> | 1.996 | 0.48992  |
| O9  |                    | 1.680 | 1.846909 | O11 |                   | 1.996 | 0.48992  |
| O8  |                    | 1.923 | 0.957678 | O12 |                   | 1.984 | 0.50607  |
| O12 |                    | 2.356 | 0.297151 | O12 |                   | 1.984 | 0.50607  |
| O11 |                    | 2.355 | 0.297956 | O5  |                   | 1.980 | 0.51157  |
| O1  |                    | 1.905 | 1.00542  | O6  |                   | 1.980 | 0.51157  |
|     |                    |       | 6.112794 |     |                   |       | 3.015119 |

**Table 2.** BVS calculations for **1b**

|     | Mo                 | Ro    | B        |     | Mo                 | Ro    | B        |
|-----|--------------------|-------|----------|-----|--------------------|-------|----------|
|     |                    | 1.907 | 0.37     |     |                    | 1.907 | 0.37     |
| O15 | Mo <sup>VI</sup> 2 | 1.701 | 1.745004 | O5  | Mo <sup>VI</sup> 1 | 1.899 | 1.021857 |
| O7  |                    | 1.696 | 1.768745 | O11 |                    | 2.428 | 0.244606 |
| O5  |                    | 1.937 | 0.922119 | O1  |                    | 2.357 | 0.296349 |
| O12 |                    | 2.414 | 0.254038 | O14 |                    | 1.686 | 1.817201 |
| O8  |                    | 1.917 | 0.973335 | O3  |                    | 1.909 | 0.994609 |
| O14 |                    | 2.414 | 0.254038 | O4  |                    | 1.724 | 1.639833 |
|     |                    |       | 5.917279 |     |                    |       | 6.014455 |

|     | Mo                 | Ro    | B        |     | Mn                | Ro    | B        |
|-----|--------------------|-------|----------|-----|-------------------|-------|----------|
|     |                    | 1.907 | 0.37     |     |                   | 1.732 | 0.37     |
| O3  | Mo <sup>VI</sup> 3 | 1.921 | 0.962869 | O11 | Mn <sup>III</sup> | 1.943 | 0.565373 |
| O8  |                    | 1.928 | 0.944824 | O11 |                   | 1.943 | 0.565373 |
| O6  |                    | 1.686 | 1.817201 | O12 |                   | 1.936 | 0.576171 |
| O9  |                    | 1.711 | 1.698473 | O12 |                   | 1.936 | 0.576171 |
| O12 |                    | 2.358 | 0.29555  | O1  |                   | 2.057 | 0.415456 |
| O11 |                    | 2.319 | 0.328403 | O1  |                   | 2.057 | 0.415456 |
|     |                    |       | 6.04732  |     |                   |       | 3.113999 |

**Table 3.** BVS calculations for **1c**

|     | Mo                 | Ro    | B        |     | Mo                 | Ro    | B        |
|-----|--------------------|-------|----------|-----|--------------------|-------|----------|
|     |                    | 1.907 | 0.37     |     |                    | 1.907 | 0.37     |
| O7  | Mo <sup>VI</sup> 2 | 1.712 | 1.693889 | O3  | Mo <sup>VI</sup> 1 | 1.914 | 0.981259 |
| O6  |                    | 1.704 | 1.730912 | O1  |                    | 1.717 | 1.671153 |
| O4  |                    | 2.371 | 0.285346 | O4  |                    | 1.714 | 1.684757 |
| O5  |                    | 1.925 | 0.952516 | O11 |                    | 1.936 | 0.924615 |
| O12 |                    | 2.351 | 0.301194 | O5  |                    | 2.311 | 0.335581 |
| O8  |                    | 1.918 | 0.970708 | O2  |                    | 2.433 | 0.241322 |
|     |                    |       | 5.934565 |     |                    |       | 5.838687 |

|     | Mo                 | Ro    | B        |     | Mn                | Ro    | B        |
|-----|--------------------|-------|----------|-----|-------------------|-------|----------|
|     |                    | 1.907 | 0.37     |     |                   | 1.732 | 0.37     |
| O10 | Mo <sup>VI</sup> 3 | 1.918 | 0.970708 | O11 | Mn <sup>III</sup> | 1.930 | 0.58559  |
| O9  |                    | 2.371 | 0.285346 | O11 |                   | 1.930 | 0.58559  |
| O8  |                    | 2.351 | 0.301194 | O12 |                   | 2.127 | 0.343844 |
| O12 |                    | 1.925 | 0.952516 | O12 |                   | 2.127 | 0.343844 |
| O11 |                    | 1.704 | 1.730912 | O5  |                   | 1.924 | 0.595164 |
|     |                    | 1.712 | 1.693889 | O6  |                   | 1.924 | 0.595164 |
|     |                    |       | 5.934565 |     |                   |       | 3.049195 |

**Table 4.** Bond lengths and angles for **1a**, **1b** and **1c**

|                       | (1a)                 | (1b)              | (1c)                |
|-----------------------|----------------------|-------------------|---------------------|
| <b>Distances (Å)</b>  |                      |                   |                     |
| B-O                   | 1.380(3)-1.440(3)    | 1.340(4)-1.510(4) | 1.330(11)-1.361(10) |
| N-C <sub>alkoxo</sub> | 1.416(18)-1.514(19)  | 1.470(3)-1.500(3) | 1.476(6)            |
| N=C                   | 1.235(14)-1.259(14)  | 1.260(3)-1.320(3) | 1.250(7)            |
| B-N                   |                      | 1.830(4)-1.870(4) |                     |
| O-C <sub>MeOH</sub>   |                      | 1.440(3)-1.460(3) |                     |
| O-C <sub>diol</sub>   |                      |                   | 1.443(11)-1.462(10) |
| <b>Angles (°)</b>     |                      |                   |                     |
| O-B-O                 | 111.12(18)-113.6(18) | 108.0(3)-110.0(3) | 122.8(8)            |

|                     |                   |                   |                   |
|---------------------|-------------------|-------------------|-------------------|
| O-B-C <sub>Ar</sub> | 116.0(2)-130.0(2) | 114.0(3)-125.0(3) | 115.9(7)-121.3(6) |
|---------------------|-------------------|-------------------|-------------------|

|                         | <b>1a</b>                                                                                                      | <b>1b</b>                                                                                                         | <b>1c</b>                                                                                        |
|-------------------------|----------------------------------------------------------------------------------------------------------------|-------------------------------------------------------------------------------------------------------------------|--------------------------------------------------------------------------------------------------|
| Empirical formula       | C <sub>70</sub> H <sub>134</sub> B <sub>2</sub> Mn <sub>1</sub> Mo <sub>6</sub> N <sub>5</sub> O <sub>28</sub> | C <sub>148</sub> H <sub>284</sub> B <sub>4</sub> Mn <sub>2</sub> Mo <sub>12</sub> N <sub>10</sub> O <sub>56</sub> | C <sub>76</sub> H <sub>142</sub> B <sub>2</sub> MnMo <sub>6</sub> N <sub>5</sub> O <sub>28</sub> |
| Formula weight          | 2146.01                                                                                                        | 4404.23                                                                                                           | 2226.14                                                                                          |
| Crystal system          | Monoclinic                                                                                                     | Monoclinic                                                                                                        | Monoclinic                                                                                       |
| a / Å                   | 24.0713(6)                                                                                                     | 22.8863(8)                                                                                                        | 35.796(3)                                                                                        |
| b / Å                   | 14.3578(5)                                                                                                     | 24.7348(7)                                                                                                        | 13.2361(3)                                                                                       |
| c / Å                   | 28.5472(15)                                                                                                    | 18.1665(6)                                                                                                        | 25.8822(19)                                                                                      |
| α / °                   |                                                                                                                |                                                                                                                   |                                                                                                  |
| β / °                   | 94.407(3)                                                                                                      | 93.009(3)                                                                                                         | 128.966(12)                                                                                      |
| γ / °                   |                                                                                                                |                                                                                                                   |                                                                                                  |
| V / Å <sup>3</sup>      | 9837.1(7)                                                                                                      | 10269.6(6)                                                                                                        | 9534.8(16)                                                                                       |
| ρ g / cm <sup>-3</sup>  | 1.449                                                                                                          | 1.424                                                                                                             | 1.551                                                                                            |
| Z                       | 4                                                                                                              | 2                                                                                                                 | 4                                                                                                |
| μ (Cu) mm <sup>-1</sup> | 7.646                                                                                                          | 7.338                                                                                                             | 7.911                                                                                            |
| Total reflections       | 78795                                                                                                          | 26623                                                                                                             | 33269                                                                                            |
| Unique reflections      | 10426                                                                                                          | 10748                                                                                                             | 9745                                                                                             |
| No. parameters          | 220                                                                                                            | 590                                                                                                               | 540                                                                                              |
| F(000)                  | 4400                                                                                                           | 4528                                                                                                              | 4576                                                                                             |
| R <sub>1</sub>          | 0.0742                                                                                                         | 0.1071                                                                                                            | 0.0472                                                                                           |
| wR <sub>2</sub>         | 0.2487                                                                                                         | 0.2975                                                                                                            | 0.1448                                                                                           |
| GOF                     | 1.147                                                                                                          | 1.074                                                                                                             | 1.129                                                                                            |



**Table 5.** Crystallographic data for **1a**, **1b** and **1c**

### References

1. B. Hasenknopf, R. Delmont, P. Herson and P. Gouzerh, *Eur. J. Inorg. Chem.* **2002**, 5, 1081-87.
2. Hormillosa, C.; Healy, S.; Tamon, S.; and Brown, I. D. Bond Valence Calculator version 2.00; Institute for Materials Research, McMaster University: Hamilton, Ontario, 1993.
3. Sheldrick, G. M., *Acta. Cryst. Sec. A.*, **2015**, A71, 3-8.
4. Dolomanov, O. V., Bourhis, L. J., Gildea, R. J., Howard, J. A. K. and Puschmann, H., *J. Appl. Cryst.* **2009**, 42, 339-341.
